# Supplementary material
Source: Springer Nature journal article supplement (https://www.springermedizin.de/resource/supplementary/12885_2012_3708_MOESM4_ESM.pdf/9464890)

**a**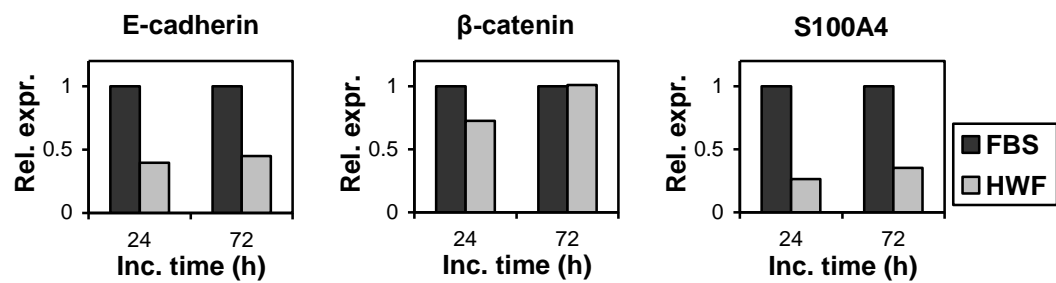**b**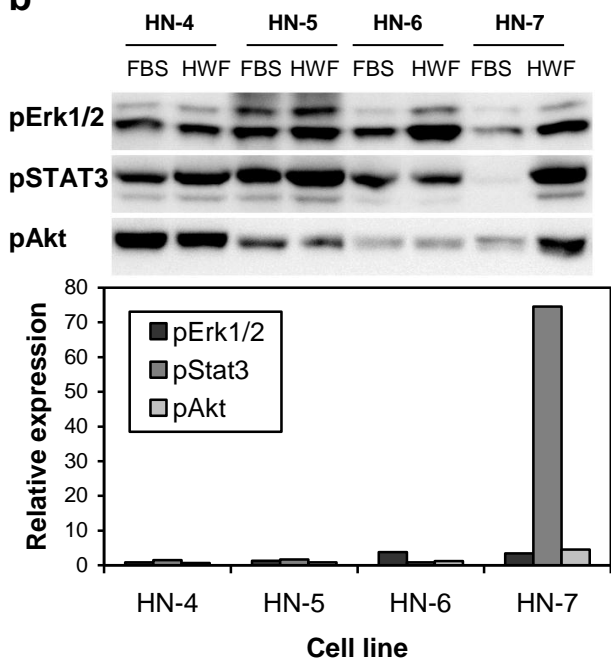**c**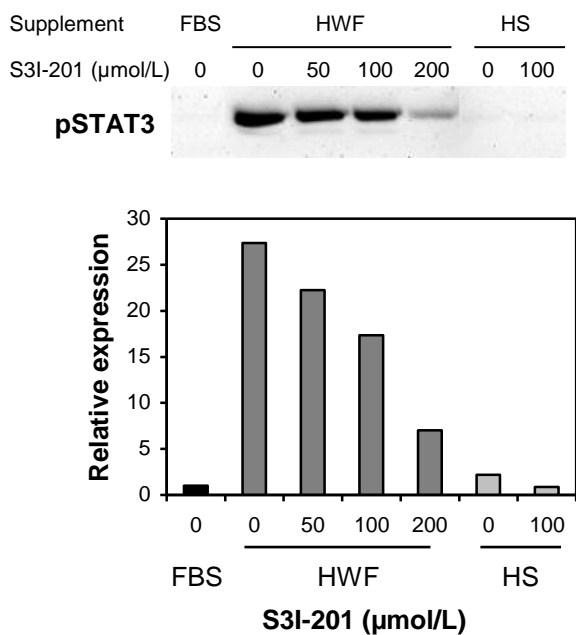**d**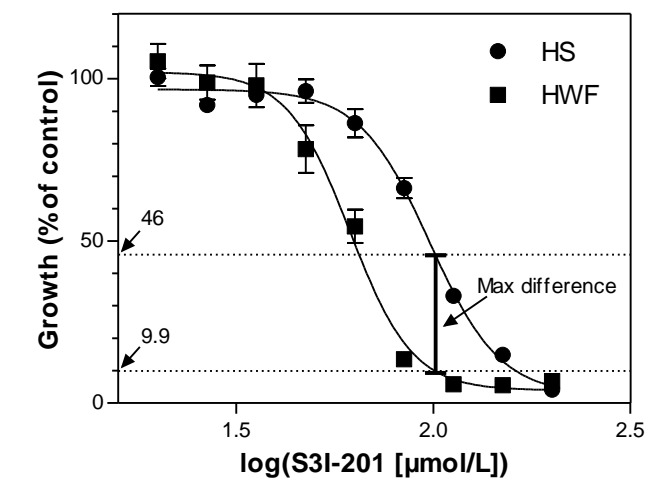**e**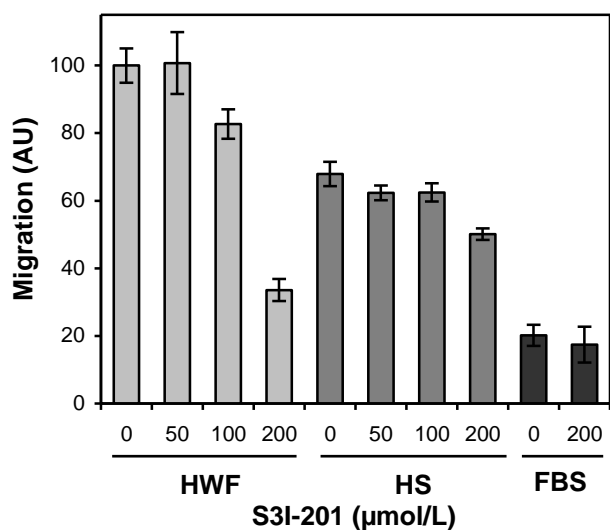

Supplement: MOESM4 [file 9464890]
